# Supplementary material
Source: PubMed Central journal article supplement (PMC6776880)
Supplement: NIHMS1052607-supplement-Supplementary_Appendix.pdf [file NIHMS1052607-supplement-Supplementary_Appendix.pdf]

## Supplementary Appendix

This appendix has been provided by the authors to give readers additional information about their work.

Supplement to: Herold KC, Bundy BN, Long SA, et al. An anti-CD3 antibody, teplizumab, in relatives at risk for type 1 diabetes. *N Engl J Med* 2019;381:603-13. DOI: 10.1056/NEJMoa1902226

## Supplementary Appendix

### Table of Contents

|                                           | <u>Pages</u> |
|-------------------------------------------|--------------|
| TrialNet study personnel                  | 2-6          |
| Supplementary Methods                     | 7            |
| Supplementary Figures S1-S8               | 8-15         |
| Supplementary Tables S1-S3                | 16-18        |
| References for the Supplementary Appendix | 19           |

**Type 1 Diabetes TrialNet Study Group  
Personnel as of 1/31/2019.**

**Steering Committee:** Carla J. Greenbaum (Benaroya Research Institute), Mark A. Atkinson (University of Florida), David A. Baidal (University of Miami), Manuela Battaglia (San Raffaele University), Dorothy Becker (University of Pittsburgh), Penelope Bingley (University of Bristol), Emanuele Bosi (San Raffaele University), Jane Buckner (Benaroya Research Institute), Mark Clements (The Children's Mercy Hospital), Peter G. Colman (Walter & Eliza Hall Institute of Medical Research), Linda DiMeglio (Indiana University), Carmella Evans-Molina (Indiana University), Stephen E. Gitelman (University of California, San Francisco), Robin Goland (Columbia University), Peter Gottlieb (Barbara Davis Center for Childhood Diabetes), Kevan Herold (Yale University), Mikael Knip (University of Helsinki), Jeffrey P. Krischer (University of South Florida), Ake Lernmark (Skane University Hospital), Wayne Moore (The Children's Mercy Hospital), Antoinette Moran (University of Minnesota), Andrew Muir (Emory Children's Center), Jerry Palmer (University of Washington), Mark Peakman (King's College), Louis Philipson (University of Chicago), Philip Raskin (University of Texas Southwestern), Maria Redondo (Baylor Texas Children's Hospital), Henry Rodriguez (University of South Florida Diabetes and Endocrinology Center), William Russell (Vanderbilt Eskind Diabetes Clinic), Desmond A. Schatz (University of Florida), Jay M. Sosenko (University of Miami), Lisa Spain (National Institute of Diabetes and Digestive and Kidney Diseases [NIDDK]), John Wentworth (Walter & Eliza Hall Institute of Medical Research), Diane Wherrett (University of Toronto), Darrell M. Wilson (Stanford University), William Winter (University of Florida), Anette Ziegler (Technical University Munich).

**Past Members:** Mark Anderson (University of California, San Francisco), Peter Antinozzi (Wake Forest University), Richard Insel (Juvenile Diabetes Research Foundation [JDRF]), Thomas Kay (St. Vincent's Institute of Medical Research), Jennifer B. Marks (University of Miami), Alberto Pugliese (University of Miami), Bart Roep (Leiden University Medical Center), Jay S. Skyler (University of Miami), Jorma Toppari (Hospital District of Southwest Finland).

**Executive Committee:** Carla J. Greenbaum (Benaroya Research Institute), Jeffrey P. Krischer (University of South Florida), Ellen Leschek (National Institute of Diabetes and Digestive and Kidney Diseases [NIDDK]), Lisa Spain (National Institute of Diabetes and Digestive and Kidney Diseases [NIDDK]).

**Past Members:** Katarzyna Bourcier (National Institute of Allergy and Infectious Diseases [NIAID]), Richard Insel (Juvenile Diabetes Research Foundation [JDRF]), John Ridge (National Institute of Allergy and Infectious Disease [NIAID]), Jay S. Skyler (University of Miami).

**Chair's Office:** Carla J. Greenbaum (Benaroya Research Institute), Lisa Rafkin (University of Miami), Jay M. Sosenko (University of Miami).

**Past Members:** Jay S. Skyler (University of Miami), Irene Santiago (University of Miami).

**TrialNet Coordinating Center (University of South Florida):** Jeffrey P. Krischer, Brian Bundy, Michael Abbondandolo, Timothy Adams, Ilma Asif, Jenna Bjellquist, Matthew Boonstra, Mario Cleves, David Cuthbertson, Meagan DeSalvatore, Christopher Eberhard, Steve Fiske, Julie Ford, Jennifer Garmeson, Susan Geyer, Brian Hays, Courtney Henderson, Kathleen Heyman, Belinda Hsiao, Christina Karges, Beata-Gabriela Koziol, Lindsay Lane, Shu Liu, Jennifer Lloyd, Kristin Maddox, Jamie Malloy, Julie Martin, Cameron McNeill, Margaret Moore, Sarah Muller, Thuy Nguyen, Jodie Nunez, Ryan O'Donnell, Melissa Parker, MJ Pereyra, Amy Roberts, Kelly Sadler, Christine Sullivan, Roy Tamura, Elon Walker-Veras, Megan V. Warnock, Keith Wood, Rebecca Wood, Vanessa Yanek, Kenneth Young.

**Past Members:** Darlene Amado, Cristina Burroughs, Martha Henry, Amanda Kinderman, Ashley Leinbach, Jessica Miller, Nichole Reed, Tina Stavros, Ping Xu.

**National Institute of Diabetes and Digestive and Kidney Diseases [NIDDK]:** Ellen Leschek, Lisa Spain.

**Data Safety and Monitoring Board:** Emily Blumberg (University of Pennsylvania), Sean Aas (Georgetown University), Gerald Beck (Cleveland Clinic Foundation), Rose Gubitosi-Klug (Case Western Reserve University), Lori Laffel (Joslin Diabetes Center), Robert Vigersky (Medtronic), Dennis Wallace (Research Triangle Institute).

**Past Members:** David Brillon (Cornell University), Robert Veatch (Georgetown University).

**Infectious Disease Safety Committee:** Brett Loechelt (Children's National Medical Center), Lindsey Baden (Brigham and Women's Hospital), Peter Gottlieb (Barbara Davis Center for Childhood Diabetes), Michael Green (University of Pittsburgh), Ellen Leschek (National Institute of Diabetes and Digestive and Kidney Diseases [NIDDK]), Adriana Weinberg (University of Colorado).

**Laboratory Directors:** Santica Marcovina (University of Washington), Jerry P. Palmer (University of Washington), Jay Tischfield (Rutgers University), Adriana Weinberg (University of Colorado), William Winter (University of Florida), Liping Yu (Barbara Davis Center for Childhood Diabetes).

**TrialNet Clinical Network Hub (Benaroya Research Institute):** Annie Shultz, Emily Batts, Arielle Pagryzinski, Mary Ramey, Meghan Tobin.

**Past Members:** Kristin Fitzpatrick, Randy Guerra, Melita Romasco, Christopher Webb.

**Active Personnel at Sites Participating in the TN10 Protocol:**

**Barbara Davis Center for Childhood Diabetes, Aurora, Colorado:** Peter Gottlieb, Brenda Bradfield, Lexie Chesshir, Kevin Deane, Aaron Michels, Kimber Simmons, Viral Shah, Andrea Steck, Christopher Striebich, Megan VanDyke, Paul Wadwa, Ruthie Williamson.

**Baylor College of Medicine, Houston, Texas:** Maria Redondo, Sandra Pena.

**Benaroya Research Institute, Seattle, Washington:** Carla J. Greenbaum, Jane Buckner, Wei Hao, Sandra Lord, Marli McCulloch-Olson, Mary Ramey, Elaine Sachter, Jenna Snavelly, Meghan Tobin, Corinna Tordillos, Dana VanBuecken.

**Childrens Hospital Los Angeles, Los Angeles, California:** Roshanak Monzavi, Daniel Bisno, Lynda Fisher, Jennifer Raymond.

**The Children's Mercy Hospital, Kansas City, Missouri:** Wayne Moore, Ghufuran Babar, Julia Broussard, Joe Cernich, Mark Clements, Max Feldt, Heather Harding, Terri Luetjen, Ryan McDonough, Tiffany Musick, Nikita Raje, Angela Turpin, Figen Ugrasbul.

**Columbia University, New York, New York:** Robin Goland, Analia Alvarez, Magdalena Bogun, Rachelle Gandica, Natasha Leibel, Sarah Pollak, Barney Softness, Kristen Williams.

**Dartmouth-Hitchcock Medical Center, Lebanon, New Hampshire:** Samuel Casella, Carlyn Herz, Kimberly Walsh.

**East Tennessee Childrens Hospital, Knoxville, Tennessee:** Elizabeth Wirthwein, Ruby Joshi Batajoo, Cheryl Dothard, James Kerrigan, Carmen Tapiador.

**Endocrinology Specialists, Greenville Health System, Greenville, South Carolina:** Sandra Weber, Shirley Parker.

**GHS Pediatric Endocrinology, Greenville, South Carolina:** Elaine Apperson, James Amrhein, Carrie Frost, Melissa Garganta, Lisa Looper, Bryce Nelson, Andrew Smith, Beth Weir, Lori Wise.

**The Hospital for Sick Children, Toronto, Canada:** Diane Wherrett, Danyella Dias, Lesley Eisel, Jennifer Harrington, Roze Kovalakovska, Bianca Perro, Mary Jo Ricci.

**Indiana University, Indianapolis, Indiana:** Linda DiMeglio, Carmella Evans-Molina, Megan Hildinger, Heba Ismail, Juan Sanchez, Emily Sims, Maria Spall, Stephanie Woerner.

**Joslin Diabetes Center, Boston, Massachusetts:** Jason Gaglia, Nora Bryant, Brittany Resnick, Jeanne Turley, Gordon Weir.

**San Raffaele University, Milan, Italy:** Emanuele Bosi, Andrea Bolla, Pauline Grogan, Andrea Laurenzi, Sabina Martinenghi, Chiara Molinari, Matteo Pastore, Alessandra Petrelli.

**Technical University Munich, Munchen, Germany:** Anette Ziegler, Peter Achenbach, Melanie Bunk, Melanie Herbst, Julia Hirte, Anna Hofelich, Verena Hoffmann, Franziska Reinmüller, Katharina Warncke, Stephanie Zillmer.

**University of California, San Francisco, California:** Stephen E. Gitelman, Mark Anderson, Glenna Auerback, Jeanne Buchanan, Ayca Erkin-Cakmak, Christine Ferrara, Alyssa Huang, Karen Ko, Janet Lee, Roger Long, Srinath Sanda, Lorraine Stiehl, Christine Torok, Rebecca Wesch.

**University of Cambridge, Cambridge, England:** Frank Waldron-Lynch, Carlo Acerini, Antonella Ghezzi.

**University of Chicago, Chicago, Illinois:** Louis Philipson, Gail Gannon, Harini Kolluri.

**University of Florida, Gainesville, Florida:** Desmond Schatz, Annie Abraham, Anastasia Albanese-O'Neill, Michael Haller, Paul Hiers, Jennifer Hosford, Laura Jacobsen, Henry Rohrs, Janet Silverstein, Madison Smith, Paula Towe, William Winter, Chelsea Zimmerman.

**University of Iowa, Iowa City, Iowa:** Eva Tsalikian, Joanne Cabbage, Julie Coffey, Michael Tansey.

**University of Miami, Miami, Florida:** David A. Baidal, Carlos Blaschke, Della Matheson, Jay S. Skyler.

**University of Minnesota, Minneapolis, Minnesota:** Antoinette Moran, Melena Bellin, Janice Leschyshyn, Jennifer McVean, Brandon Nathan, Brittney Nelson, Beth Pappenfus, Jessica Ruedy, Anne Street, Darcy Weingartner.

**University of North Carolina at Chapel Hill, Chapel Hill, North Carolina:** Ali Calikoglu, Chayla Hart, Marian Kirkman.

**University of Pittsburgh, Pittsburgh, Pennsylvania:** Dorothy Becker, Kelli DeLallo, David Groscost, Mary Beth Klein, Ingrid Libman, Karen Riley.

**University of South Florida Diabetes and Endocrinology Center, Tampa, Florida:** Henry Rodriguez, Sureka Bollepalli, Rachel Brownstein, Emily Eyth, Danielle Gomez, Verena Jorgensen, Dorothy Shulman.

**University of Texas Southwestern, Dallas, Texas:** Philip Raskin, Lauren Boyles.

**University of Utah, Salt Lake City, Utah:** Carol Foster, Elisa Anguiano, Cassandra Davis, Mary Murray, Vandana Raman, Hillarie Slater.

**Vanderbilt Eskind Diabetes Clinic, Nashville, Tennessee:** William Russell, Faith Brendle, Anne Brown, Brenna Dixon, Dan Moore, James Thomas.

**Washington University, St. Louis, Missouri:** Neil White, Lucy Levandoski.

**Walter & Eliza Hall Institute of Medical Research, Parkville, Australia:** Peter G. Colman, John Wentworth, Marika Bjoransen, Candice Breen, Spiros Furlanos, Felicity Healy, Leanne Redl.

**Yale University, New Haven, Connecticut:** Kevan Herold, Laurie Feldman, Jennifer Sherr, Robert Sherwin, William Tamborlane, Stuart Weinzimer.

## **Supplementary methods:**

**Patient identification:** Potential participants were identified in the TrialNet Pathway to Prevention (PTP) study. The PTP study enrolled first degree relatives of patients with T1D, ages 1-45, and up to age 20 in second- or third- degree relatives, evaluated diabetes autoantibodies to microinsulin (mIAA), glutamic acid decarboxylase-65 (GAD), and insulinoma-associated antigen-2 (IA-2, or ICA512). Islet cell (ICA) and zinc transporter 8 (ZnT8) autoantibodies were measured if at least 1 other antibody tested positive.

**Drug Dosing:** Those assigned to active study drug received teplizumab at a total dose of 9,034 µg/m<sup>2</sup> over 14 days as described in the Methods. Participants randomized to the placebo arm received a 14-day course of matching IV saline. Participants received ibuprofen and diphenhydramine prior to infusions on the first 5 days, and further dosing with ibuprofen, diphenhydramine and/or acetaminophen thereafter as needed for symptomatic relief. Protocol defined stopping criteria for study drug infusions were followed. During the entire study, all subjects had interim contact with study personnel for formal inquiry about adverse events and symptoms of diabetes.

**Laboratory Methods:** mIAA, GAD-65Ab, ICA-512Ab, ZnT8A were measured using radio-immunobinding assays at the Barbara Davis Diabetes Center, Anschutz CO, and ICA using indirect immunofluorescence at the University of Florida at Gainesville. C-peptide, glucose and HbA<sub>1c</sub> were measured at the Northwest Research Laboratory, Seattle, WA. C-peptide was measured from frozen plasma by two-site immunoenzymometric assay (Tosoh Bioscience, South San Francisco, CA) at the HbA<sub>1c</sub> was measured using ion-exchange high performance liquid chromatography (Variant II, Bio-Rad Diagnostics, Hercules, CA). Reliability coefficients for each assay were above 0.99 from split duplicate samples. EBV and CMV viral loads were measured in whole blood at the University of Colorado using previously described methods.<sup>1</sup> Positive viral loads were designated as > 500 copies of viral DNA.<sup>2,3</sup>

**Flow cytometry:** Peripheral blood mononuclear cells (PBMC) were processed and stored at the NIDDK repository. Frozen vials of PBMC were sent to Benaroya Research Institute for analysis by flow cytometry with antibody panels shown in Supplementary Table 1. T-cell phenotyping was performed on PBMC as previously described on an LSR-Fortessa (BD Biosciences) with FACS Diva software and analyzed with FlowJo software version 9.5 (Tree Star, Ashland, OR). The frequency of CD8<sup>+</sup> T-cells that were TIGIT<sup>+</sup>KLRG1<sup>+</sup>CD57<sup>-</sup>, TIGIT<sup>-</sup>KLRG1<sup>-</sup>CD57<sup>-</sup>, or CD4<sup>+</sup>CD127<sup>lo</sup>Foxp3<sup>+</sup> (CD4<sup>+</sup>Tregs) were determined as described previously.<sup>4</sup> The quadrants were placed based on staining controls.

**Trial oversight:** The results were shared with Provention Bio prior to publication. The statistical analysis plan is available at NEJM.org. The TrialNet Coordinating Center gathered, analyzed, and vouches for the data. The authors are fully responsible for the content and editorial decisions regarding the manuscript. The authors approved the final version for submission.

**Participating sites:** For screening, infusion, and follow up: Barbara Davis Center for Childhood Diabetes, Benaroya Research Institute, Indiana University - Riley Hospital for Children, Klinikum rechts der Isar, Technical University Munich, Germany, , The Children's Mercy Hospital, The Hospital for Sick Children, University of California - San Francisco, University of Florida, University of Iowa, Stead Family Children's Hospital, University of Miami, University of Minnesota, USF Diabetes Center, Vanderbilt ESKIND Diabetes Clinic, Yale University School of Medicine; Follow up: Joslin Diabetes Center, University of Utah, University of Pittsburgh, GHS - Pediatric Endocrinology, Trustees of Dartmouth College, Endocrinology Specialist/Greenville Health System, Washington University, Columbia University, University of Texas Southwestern, UNC Chapel Hill, Stanford University, Children's Hospital of Los Angeles For screening: University of Chicago, University of Cambridge, Walter and Eliza Hall Institute. The TrialNet network of sites was used for screening into the Pathway to Prevention protocol.



Supplementary Appendix Figure S1: Enrollment in the Trial

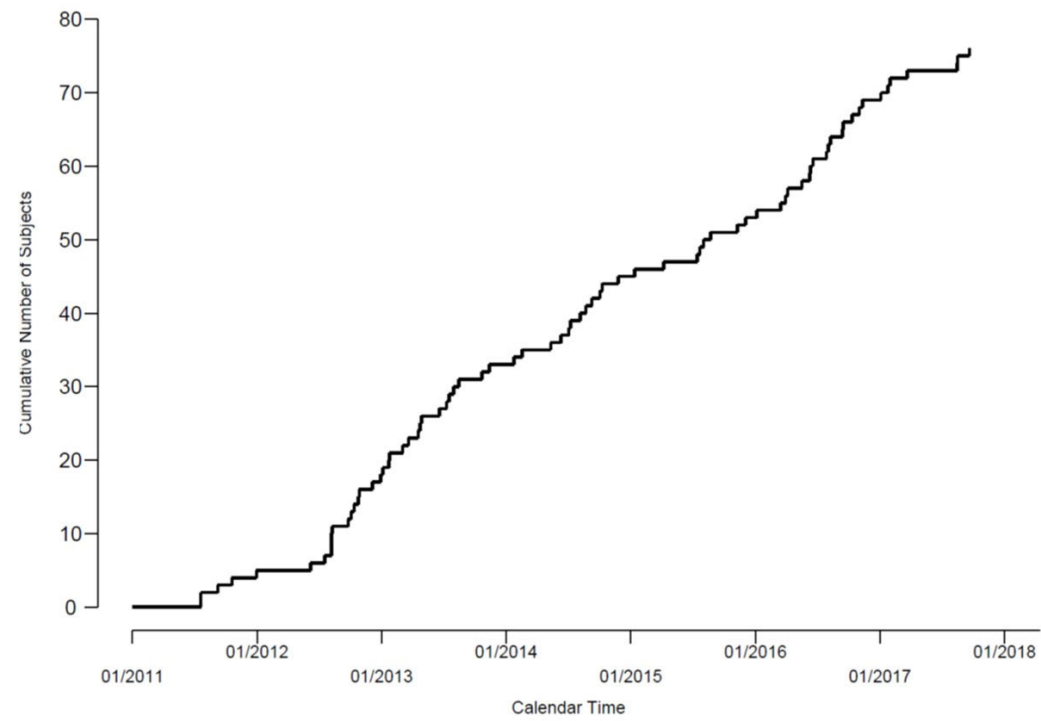

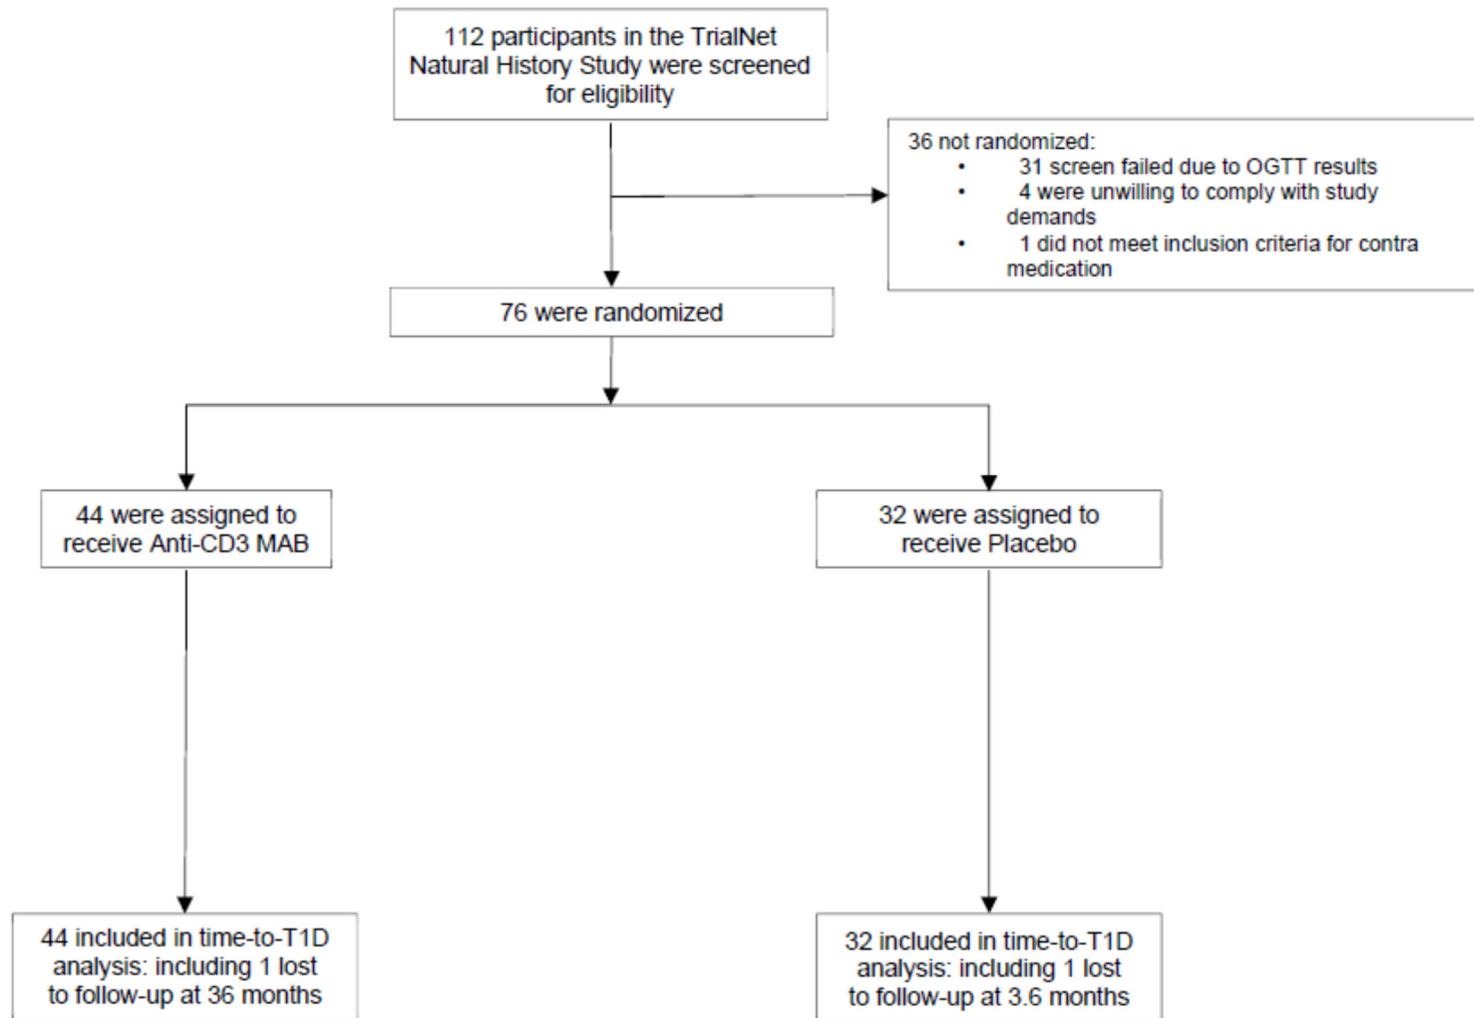

Supplementary Appendix Figure S2: Screening, enrollment and follow-up of the participants: A total of 112 participants from the TrialNet Natural History Study were screened for eligibility (see Appendix for a listing of study sites). Seventy-six of the participants were randomized to the drug or placebo arms. They were infused with study drug at one of 14 TrialNet sites and followed, as per study protocol at one of 33 sites. All randomized participants are included in the analysis.

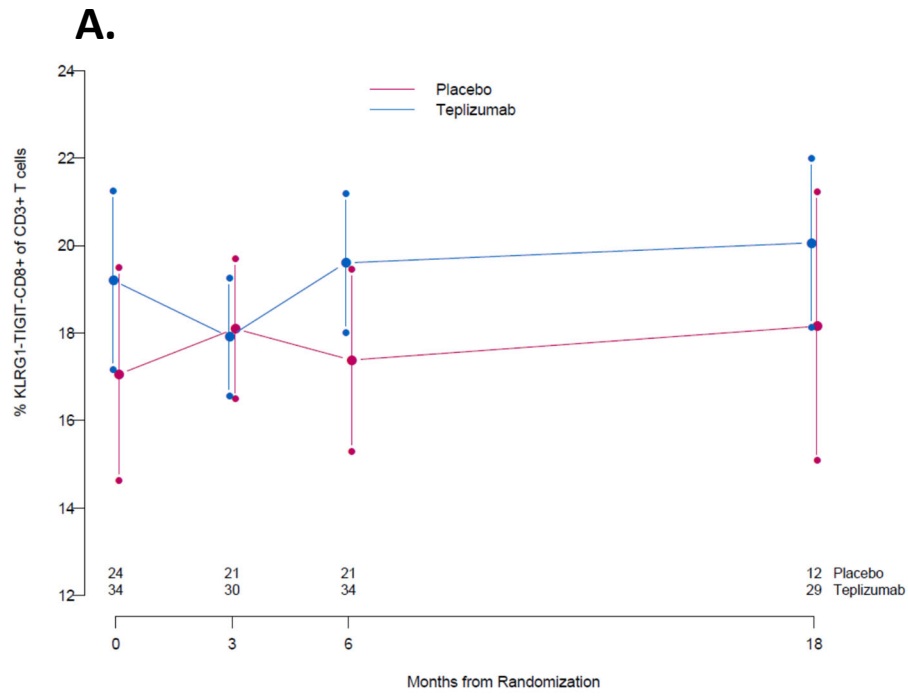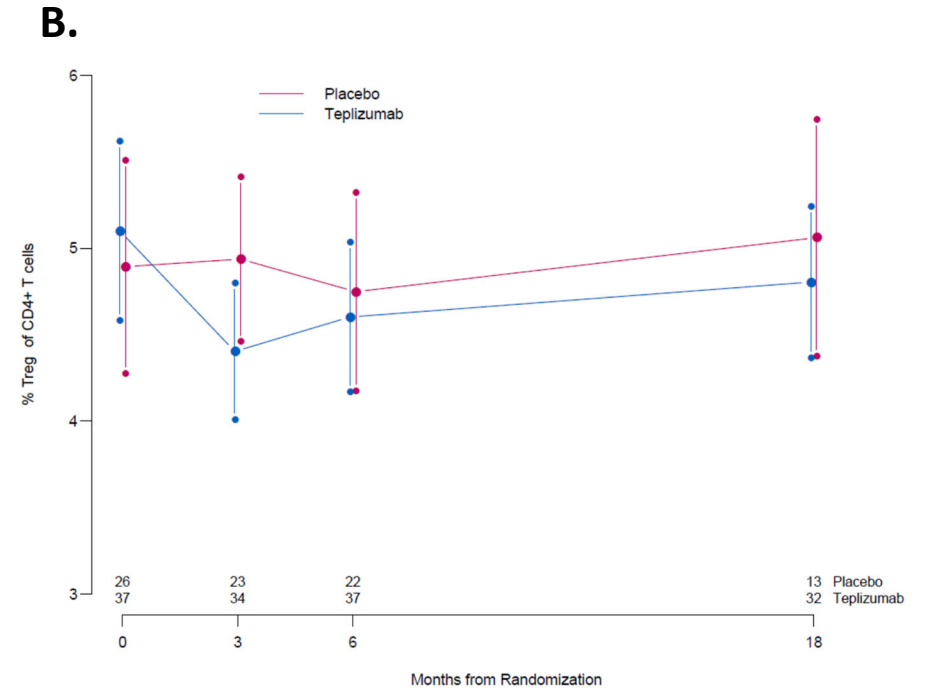

Supplementary Appendix Figure S3: The frequency of (A) KLRG1-TIGIT-CD8+ T cells (of total CD3+T cells) and (B) CD4+ Tregs (CD4+CD25+CD127<sup>lo</sup>) in the teplizumab and placebo treated groups. The mean±95% CI are shown. The analysis was performed by ANCOVA and corrected for the baseline values. The numbers along the X axis indicate the number of samples analyzed.

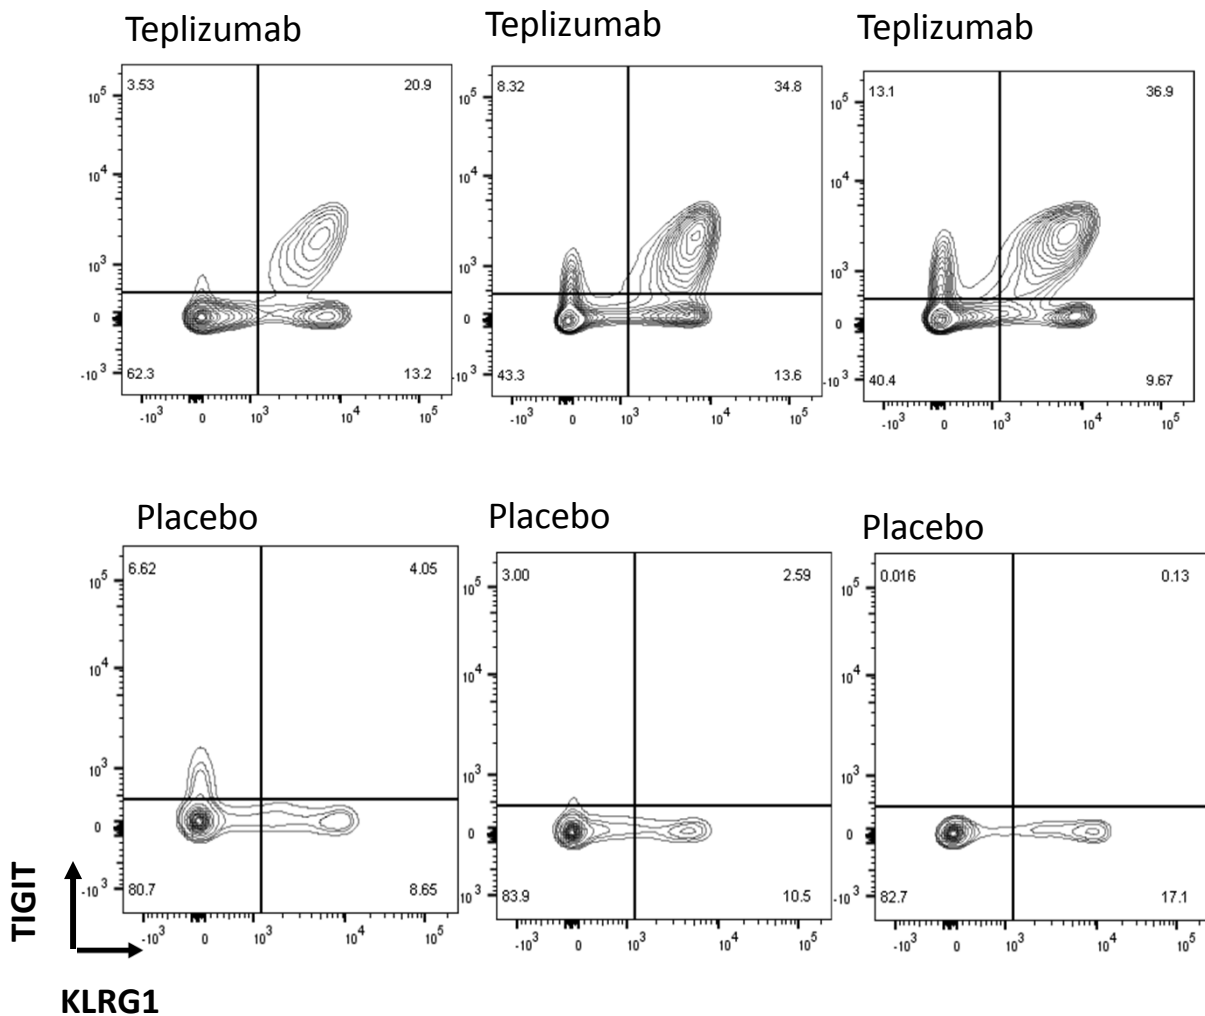

Supplementary Appendix Figure S4: FACS contour plots showing staining of TIGIT (Y axis) vs KLRG1 (X axis).

Electronic gates were placed on live CD8+CD57- T cells and the expression of KLRG1 and TIGIT are shown in peripheral blood cells from 3 subjects treated with teplizumab (top row) and 3 participants treated with placebo on samples that were acquired at month 3. The numbers refer to the proportion of the total gated cells in each quadrant. The quadrants were placed based on staining controls.

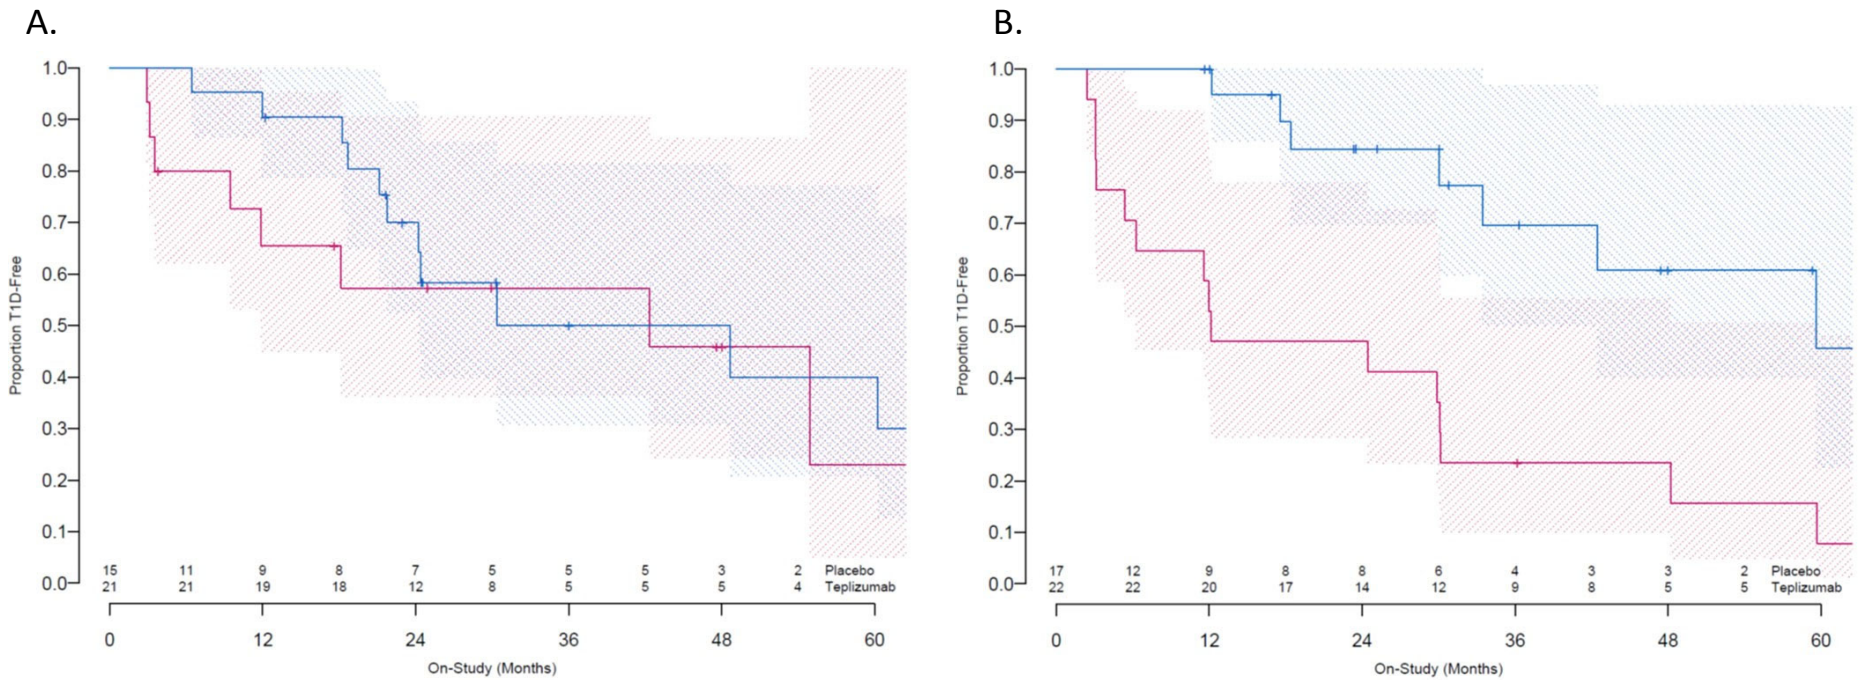

Supplementary Appendix Figure S5: The effects of teplizumab treatment in participants with (A) and without (B) HLA-DR3. The absence of HLA-DR3 (Hazard ratio:0.181 for negative, 0.907 for positive) was associated with response to teplizumab. (For each graph ----- = teplizumab, - - - - - = placebo, + = censored. The number of participants at risk are shown along the X axis. The shaded areas represent the 95% CIs.)

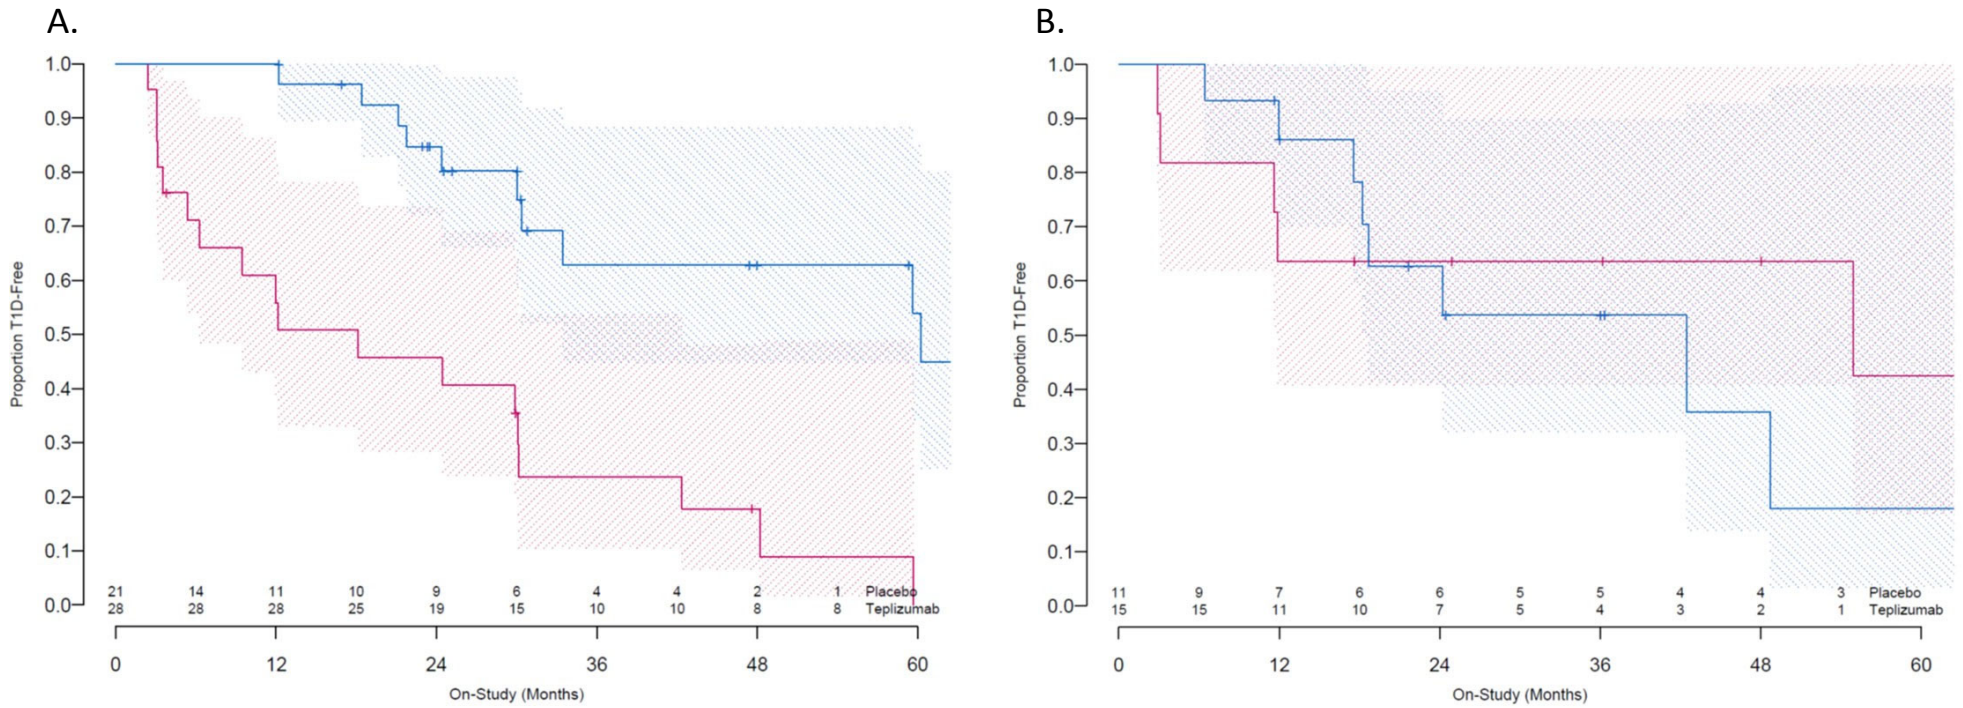

Supplementary Appendix Figure S6: The effects of teplizumab treatment in participants with (A) and without (B) HLA-DR4. The presence of HLA-DR4 (Hazard ratio: 1.47 for negative, 0.201 for positive) was associated with response to teplizumab. (For each graph ----- = teplizumab, - - - - - = placebo, + = censored. The number of participants at risk are shown along the X axis. The shaded areas represent the 95% CIs.)

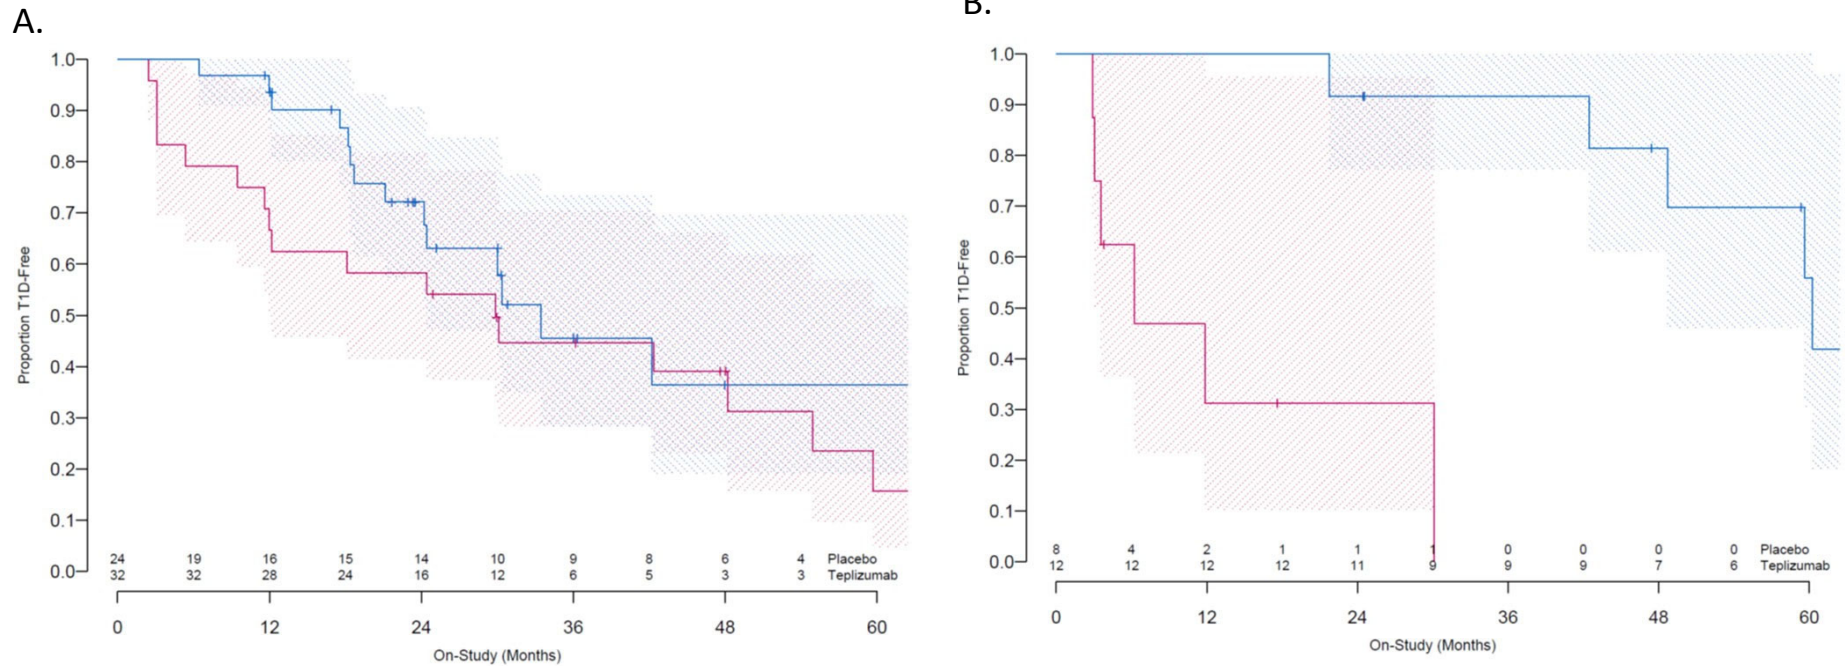

Supplementary Appendix Figure S7: The effects of teplizumab treatment in participants with (A) and without (B) anti-ZnT8 antibodies at randomization. The absence of anti-ZnT8 antibody (Hazard ratio: 0.064 for negative, 0.831 for positive) was associated with response to teplizumab. (For each graph ---- = teplizumab, - - - - = placebo, + = censored. The number of participants at risk are shown along the X axis. The shaded areas represent the 95% CIs.)

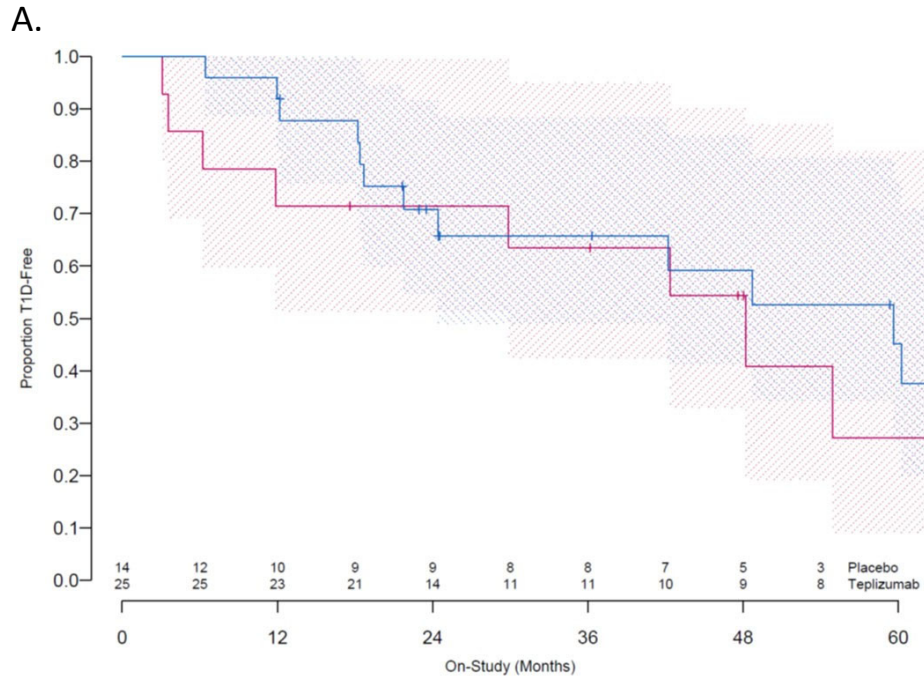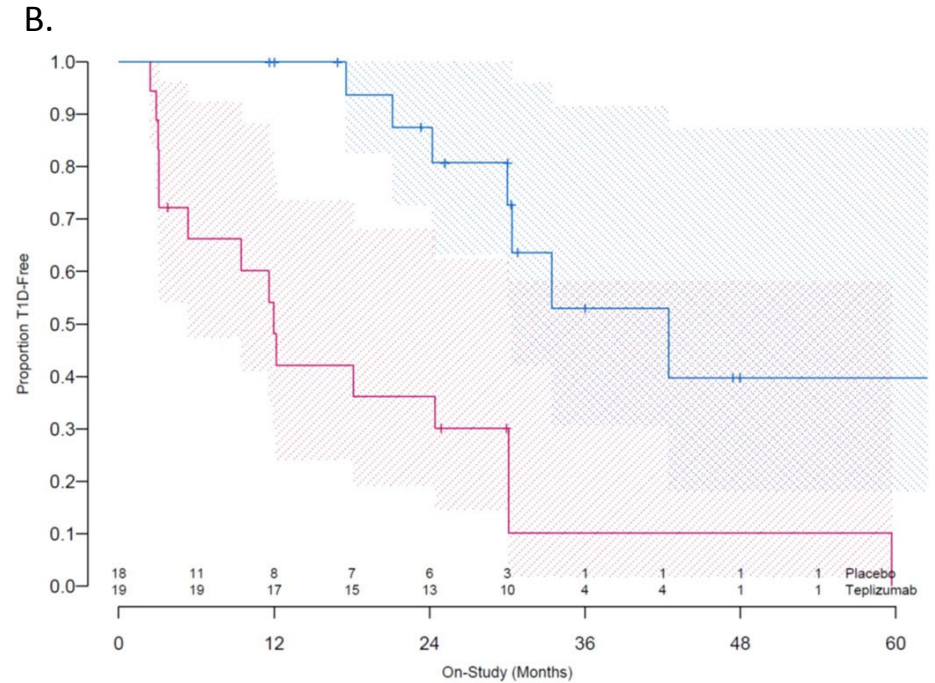

Supplemental Appendix, Figure S8: The effects of teplizumab treatment in participants whose C-peptide area under the curve during the oral glucose tolerance test at randomization was above (A) or below (B) the median (1.75 nmol/L). C-peptide responses below the median were associated with responses to teplizumab. (Hazard ratio=0.855 above (A) and 0.194 below (B) the median). (For each graph ---- = teplizumab, - - - - = placebo, + = censored. The number of participants at risk are shown along the X axis. The shaded areas represent the 95% Cis.)



**Supplementary Appendix Table S1: Monoclonal antibodies used for flow cytometry**

| <b>Marker</b> | <b>Format</b> | <b>Clone</b> | <b>Vendor</b>    |
|---------------|---------------|--------------|------------------|
| CD56          | BUV395        | NCAM16.2     | Becton Dickinson |
| CD45RA        | BUV737        | HI100        | Becton Dickinson |
| Ki67          | BV421         | Ki-67        | BioLegend        |
| CCR7          | BV510         | G043H7       | BioLegend        |
| CD3           | BV605         | OKT3         | BioLegend        |
| PD1           | BV650         | EH12.2H7     | BioLegend        |
| CD127         | BV711         | A019D5       | BioLegend        |
| CD45R0        | BV786         | UCHL1        | Becton Dickinson |
| CD4           | BB515         | RPA-T4       | Becton Dickinson |
| Eomes         | PE            | WD1928       | eBiosciences     |
| FoxP3         | PE-CF594      | 259D/C7      | Becton Dickinson |
| KLRG1         | PE-Vio770     | REA261       | Miltenyi         |
| TIGIT         | APC           | MBSA43       | eBiosciences     |
| CD8           | Ax700         | SK1          | BioLegend        |
| CD57          | APC-Vio770    | REA769       | Miltenyi         |
| Live/dead     | BUV496        | NA           | Becton Dickinson |

**Supplementary Appendix Table S2: Additional demographic data of participants**

|                                                                      | <b>Teplizumab, N=44</b>                     | <b>Placebo N=32</b>                        |
|----------------------------------------------------------------------|---------------------------------------------|--------------------------------------------|
| Male sex No. of subjects (%)                                         | 25 (56.8)                                   | 17 (53.1)                                  |
| Body Mass Index (kg/m <sup>2</sup> )-<br>median* Z-score BMI-median* | 19.6 (17.3 – 25.4)<br>0.259 (-0.754 - 1.19) | 21.5 (18.2 – 24.7)<br>0.681 (0.339 – 1.11) |
| Race - No. of subjects (%)                                           |                                             |                                            |
| White                                                                | 44 (100.0)                                  | 30 (93.8)                                  |
| African American                                                     | 0 (0.0)                                     | 0 (0.0)                                    |
| Asian                                                                | 0 (0.0)                                     | 2 (6.2)                                    |
| Ethnicity - No. of subjects (%)                                      |                                             |                                            |
| Non-Hispanic                                                         | 43 (97.7)                                   | 31 (96.9)                                  |
| Autoantibodies titer – median*                                       |                                             |                                            |
| Anti-GAD65 (harmonized)                                              | 240 (76.8 – 464)                            | 221 (42.3 – 520)                           |
| Micro Insulin                                                        | 0.0070 (0.0020 – 0.028)                     | 0.0040 (0.0020 – 0.0168)                   |
| Anti-IA-2 (harmonized)                                               | 52 (0 – 310)                                | 187 (26 – 253)                             |
| ICA                                                                  | 20 (0 – 200)                                | 80 (20 – 160)                              |
| Zinc Transporter                                                     | 0.157 (0.0133 – 0.496)                      | 0.096 (0.028 – 0.386)                      |
| No. of Autoantibodies Positive<br>(% of total)^                      |                                             |                                            |
| 1                                                                    | 1 (2.4)                                     | 0 (0.0)                                    |
| 2                                                                    | 11 (25.0)                                   | 7 (21.9)                                   |
| 3                                                                    | 12 (27.3)                                   | 5 (15.6)                                   |
| 4                                                                    | 11 (25.0)                                   | 14 (43.8)                                  |
| 5                                                                    | 9 (20.5)                                    | 6 (18.8)                                   |
| C-peptide AUC Mean, OGTT<br>(nmol/L) Median*                         | 1.76 (1.47 – 2.18)                          | 1.73 (1.44 – 2.36)                         |
| HLA alleles present - no. of subjects (%)†                           |                                             |                                            |
| Neither DR3 or DR4                                                   | 5 (11.6)                                    | 3 (9.4)                                    |
| DR3 only                                                             | 10 (23.3)                                   | 8 (25.0)                                   |
| DR4 only                                                             | 17 (39.5)                                   | 14 (43.8)                                  |

\* Parenthetical value(s): The interquartile range is displayed with the median, and percent of subjects is displayed with the number of subjects.

^ at the time of randomization. All subjects had at least 2+ autoantibodies prior to randomization.

† Missing: HLA allele status missing for 1 teplizumab-treated subject

| Year | No. of T1D*    |             | Chi-square Test† | Hazard Ratio (95%CI)‡ |                       |
|------|----------------|-------------|------------------|-----------------------|-----------------------|
|      | Teplizumab (%) | Placebo (%) |                  | Cumulative            | Interval              |
| 1    | 3 (6.8%)       | 14 (43.8%)  | 15.9             | 0.129 (0.0482, 0.343) | 0.129 (0.0482, 0.343) |
| 2    | 8 (18.2%)      | 2 (6.3%)    | 7.55             | 0.372 (0.169, 0.82)   | 1.8 (0.473, 6.88)     |
| 3    | 3 (6.8%)       | 3 (9.4%)    | 7.77             | 0.404 (0.198, 0.825)  | 0.58 (0.11, 3.05)     |
| 4    | 3 (6.8%)       | 2 (6.3%)    | 7.05             | 0.447 (0.23, 0.868)   | 0.864 (0.14, 5.33)    |
| 5    | 2 (4.5%)       | 2 (6.3%)    | 8.24             | 0.439 (0.233, 0.828)  | 0.359 (0.039, 3.32)   |

**Supplementary Appendix, Table S3: Hazard ratios by yearly interval and cumulative.** Frequency of clinical type I diabetes by treatment group and cumulative and interval hazard ratios (95% confidence Intervals) by year on-study. (\* The number of participants developing T1D in each treatment arm during the year interval are shown. In addition, the cumulative HRs and the HR for each year interval were calculated. † Mantel- Haenszel method applied to time-to-event data, both chi- square test and hazard ratio estimate.<sup>5</sup> These hazard ratios are unadjusted for the enrollment/age strata. ‡ Likelihood ratio test and hazard ratio estimate and 95% CI from the Cox model)

## References

1. Kroll J, Li S, Levi M, Weinberg A. Lytic and latent EBV gene expression in transplant recipients with and without post-transplant lymphoproliferative disorder. *J Clin Virol* 2011;52:231-5.
2. Loechelt BJ, Boulware D, Green M, et al. Epstein-Barr and other herpesvirus infections in patients with early onset type 1 diabetes treated with daclizumab and mycophenolate mofetil. *Clin Infect Dis* 2013;56:248-54.
3. Loechelt BJ, Green M, Gottlieb PA, et al. Screening and Monitoring for Infectious Complications When Immunosuppressive Agents Are Studied in the Treatment of Autoimmune Disorders. *J Pediatric Infect Dis Soc* 2015;4:198-204.
4. Long SA, Thorpe J, DeBerg HA, et al. Partial exhaustion of CD8 T cells and clinical response to teplizumab in new-onset type 1 diabetes. *Sci Immunol* 2016;1.
5. Mantel, N. Evaluation of survival data and two new rank order statistics arising in its consideration. *Cancer Chemother Rep* 1966 50:163-70.
